# Supplementary material for: Chiral Dirac-like fermion in spin-orbit-free antiferromagnetic semimetals
Source: PubMed Central journal article supplement — Innovation (Camb). 2022 Oct 19;3(6):100343. doi: 10.1016/j.xinn.2022.100343 (PMC9638832; doi:10.1016/j.xinn.2022.100343), 2022-10-19
Supplement: mmc2.pdf [file mmc2.pdf]

# Chiral Dirac-like fermion in spin-orbit-free antiferromagnetic semimetals

Pengfei Liu,<sup>1,2</sup> Ao Zhang,<sup>1</sup> Jingzhi Han,<sup>2</sup> and Qihang Liu<sup>1,3,4,\*</sup>

\*Correspondence: [liuqh@sustech.edu.cn](mailto:liuqh@sustech.edu.cn)

Received: March 16, 2022; Accepted: October 13, 2022; Published Online: October 19, 2022; <https://doi.org/10.1016/j.xinn.2022.100343>

© 2022 The Author(s). This is an open access article under the CC BY-NC-ND license (<http://creativecommons.org/licenses/by-nc-nd/4.0/>).

## GRAPHICAL ABSTRACT

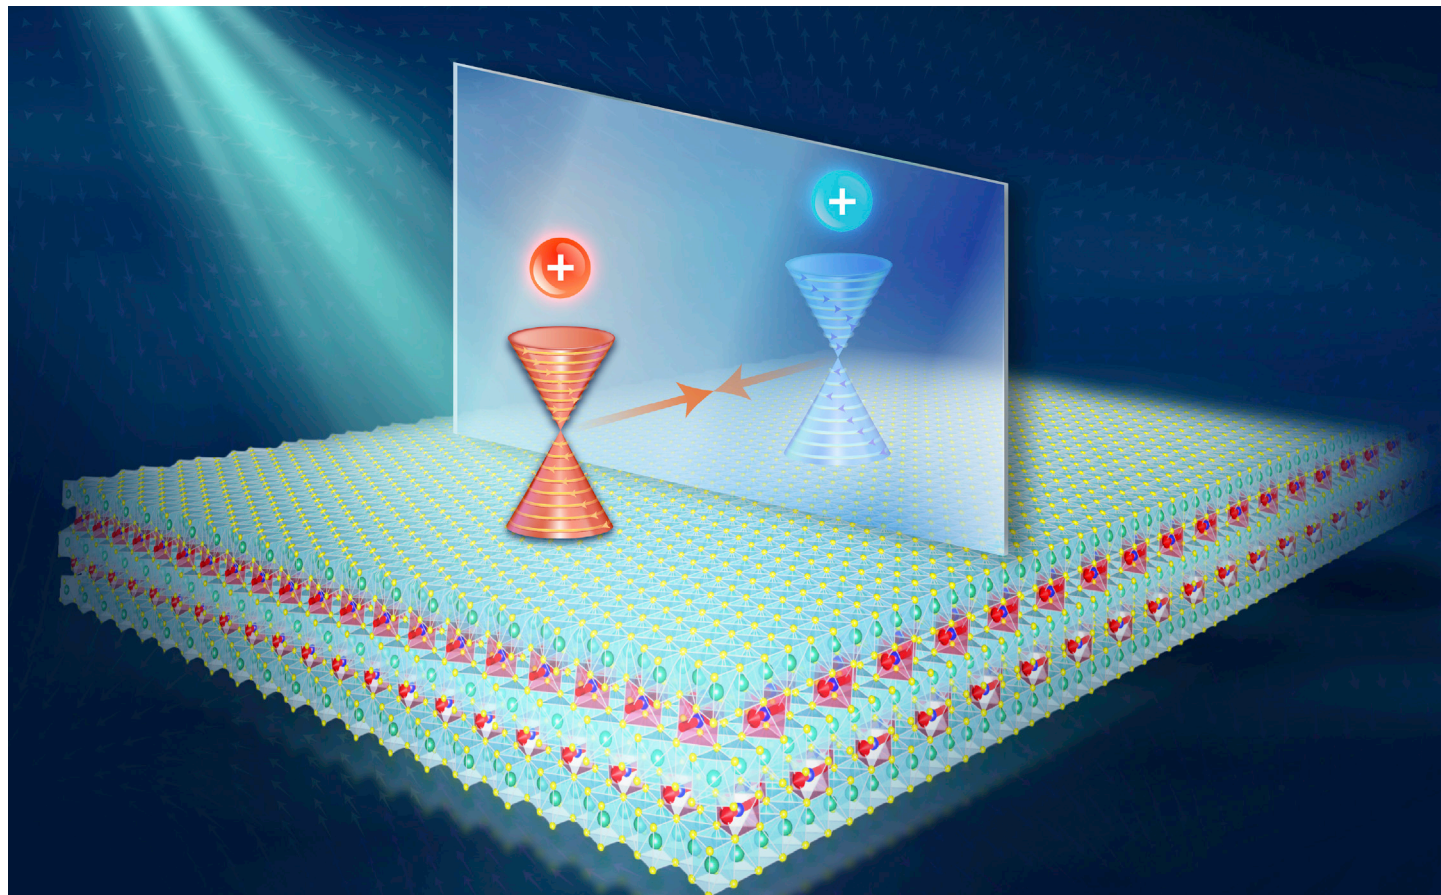

## PUBLIC SUMMARY

- A counterpart of isospin  $SU(2)$  symmetry is predicted to exist in crystalline solids
- Such symmetry is realized in some collinear antiferromagnets in nonrelativistic limit
- $\text{CoNb}_3\text{S}_6$  is a representative material manifesting Dirac-like fermions with chirality

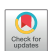

# Chiral Dirac-like fermion in spin-orbit-free antiferromagnetic semimetals

Pengfei Liu,<sup>1,2</sup> Ao Zhang,<sup>1</sup> Jingzhi Han,<sup>2</sup> and Qihang Liu<sup>1,3,4,\*</sup>

<sup>1</sup>Shenzhen Institute for Quantum Science and Engineering and Department of Physics, Southern University of Science and Technology, Shenzhen 518055, China

<sup>2</sup>School of Physics, Peking University, Beijing 100871, China

<sup>3</sup>Guangdong Provincial Key Laboratory of Computational Science and Material Design, Southern University of Science and Technology, Shenzhen 518055, China

<sup>4</sup>Shenzhen Key Laboratory of Advanced Quantum Functional Materials and Devices, Southern University of Science and Technology, Shenzhen 518055, China

\*Correspondence: liuqh@sustech.edu.cn

Received: March 16, 2022; Accepted: October 13, 2022; Published Online: October 19, 2022; <https://doi.org/10.1016/j.xinn.2022.100343>

© 2022 The Author(s). This is an open access article under the CC BY-NC-ND license (<http://creativecommons.org/licenses/by-nc-nd/4.0/>).

Citation: Liu P., Zhang A., Han J., et al., (2022). Chiral Dirac-like fermion in spin-orbit-free antiferromagnetic semimetals. *The Innovation* **3**(6), 100343.

Dirac semimetal is a phase of matter whose elementary excitation is described by the relativistic Dirac equation. In the limit of zero mass, its parity-time symmetry enforces the Dirac fermion in the momentum space, which is composed of two Weyl fermions with opposite chirality, to be non-chiral. Inspired by the flavor symmetry in particle physics, we theoretically propose a massless Dirac-like equation yet linking two Weyl fields with the identical chirality by assuming  $SU(2)$  isospin symmetry, independent of the space-time rotation exchanging the two fields. Dramatically, such symmetry is hidden in certain solid-state spin-1/2 systems with negligible spin-orbit coupling, where the spin degree of freedom is decoupled with the lattice. Therefore, the existence of the corresponding quasiparticle, dubbed as flavor Weyl fermion, cannot be explained by the conventional (magnetic) space group framework. The 4-fold degenerate flavor Weyl fermion manifests linear dispersion and a Chern number of  $\pm 2$ , leading to a robust network of topologically protected Fermi arcs throughout the Brillouin zone. For material realization, we show that the transition-metal chalcogenide  $\text{CoNb}_3\text{S}_6$  with experimentally confirmed collinear antiferromagnetic order is ideal for flavor Weyl semimetal under the approximation of vanishing spin-orbit coupling. Our work reveals a counterpart of the flavor symmetry in magnetic electronic systems, leading to further possibilities of emergent phenomena in quantum materials.

## INTRODUCTION

The Dirac equation combines the two cornerstones of modern physics—quantum mechanics and relativity. It is the first step toward the quantum field theory that gives birth to the standard model of particle physics. It complies with the Dirac quantum fields of spin- $\frac{1}{2}$  particles, furnishing particular irreducible representations (irreps) of the Lorentz group. There are several manifestations of the Dirac equation in condensed matter systems, such as graphene,<sup>1</sup> topological insulators,<sup>2–4</sup> Dirac semimetals (DSMs),<sup>5–7</sup> Weyl semimetals,<sup>8,9</sup> and  $d$ -wave high-temperature superconductors. The low-energy electronic structure of the Dirac points in a three-dimensional (3D) DSM, i.e., 4-fold degenerate crossing points formed by doubly degenerate linear bands, is well described by the massless Dirac equation in the  $(3 + 1)\text{D}$  space-time.<sup>5,10</sup> Investigations on 3D DSMs have been largely confined to the field of nonmagnetic materials where inversion symmetry  $P$  and time-reversal symmetry  $T$  coexist,<sup>6,11–14</sup> ensuring the doubly degenerate bands constituting the Dirac point. Later, candidates for DSM have been extended to include magnetic materials with broken  $T$  but preserved  $PT$  symmetry.<sup>15–17</sup> Recent progress comprehensively conducts topological classifications of magnetic materials to identify topological nontrivial insulators and semimetals by using the full magnetic space groups,<sup>18–21</sup> which are also used for the construction of  $k \cdot p$  models in order to classify emergent quasiparticle excitations in magnetic materials.<sup>22,23</sup>

A four-component Dirac field can be decomposed into two two-component Weyl fields with opposite chirality in the limit of zero mass, implying that the chirality of a massless Dirac fermion must be zero because the  $PT$  symmetry forces the two branches of each doubly degenerate band to have opposite Berry curvatures (Figure 1A). Hence, the Fermi arc surface states connecting two Dirac points in a DSM are generally not topologically protected, unlike Weyl points (Figure 1B). These properties establish the current textbook *Gestalt* underlying our understanding of Dirac physics.

Here, we propose the theory and material realization of a new semimetal phase having Dirac-like 4-fold degenerate points formed by doubly degenerate bands,

yet a nonzero chirality, dubbed as flavor Weyl semimetal (WSM) (Figures 1C and 1D). This is achieved by a massless four-component field in vacuum furnishing chiral and four-dimensional (4D) irreps, connecting two Weyl fields via a type of  $SU(2)$  flavor symmetry—analogue to the isospin symmetry relating a proton and a neutron. Remarkably, such  $SU(2)$  isospin symmetry can be obtained by spin space group—a type of expanded symmetry group compared with the traditional magnetic space group—existing in magnetic materials with negligible spin-orbit coupling (SOC).<sup>24,25</sup> Such groups were originally applied to describe the symmetry of magnons in Heisenberg Hamiltonian, while drawing recent attention for the application in discovering new topological invariants and magnetic topological phases.<sup>26–28</sup> We show that the transition-metal chalcogenide  $\text{CoNb}_3\text{S}_6$  with a chiral crystal structure and collinear antiferromagnetic (AFM) order is an ideal candidate for such flavor WSM. The resulting 4-fold degenerate quasiparticles have Chern numbers  $C = \pm 2$ , manifesting a robust network of topologically protected Fermi arcs throughout the surface Brillouin zone. Furthermore, the modified band property and topology by the effects of SOC indicate that the flavor WSM phase serves as a good starting point to understand the topological nature of  $\text{CoNb}_3\text{S}_6$ .

## RESULTS

### Theory of Dirac-like fermion with chirality

In high-energy physics, a Dirac field is a four-component field with field operators furnishing a 4D irreducible representation of Lorentz group. Such a field is non-chiral because  $P$  connects two 2D representations of proper orthochronous Lorentz group supporting two Weyl fields with opposite chirality. To construct a chiral Dirac-like four-component field, one requires additional internal symmetries (i.e., commute with space-time operations<sup>29</sup>) connecting two Weyl fields with identical chirality. A famous type of internal symmetry in particle physics is the isospin symmetry pairing a proton and a neutron forming an  $SU(2)$  doublet.<sup>29,30</sup> In analogy, we can choose a condensed-matter counterpart of such  $SU(2)$  flavor symmetry to construct a massless four-component field with chirality, named flavor Weyl field (see Note S1).

In condensed matter solids with elementary excitations (quasiparticles), although spin is an internal degree of freedom of an electron, its rotational operations are completely locked to the rotations of the lattice owing to the relativistic SOC effect. However, the symmetry description of compounds composed of light elements with negligible SOC requires decoupled spin and lattice operations, forming symmetry groups called spin groups.<sup>24–26</sup> We next show that the combination of translation and spin rotation in certain magnetic compounds with long-range magnetic order leads to a hidden  $SU(2)$  symmetry group, supporting the emergence of flavor Weyl fermions.

We considered a collinear AFM system belonging to the type-IV Shubnikov space group, as schematically shown in Figure 2A. We used a four-band model with two orbitals separately located at sublattices  $A$  and  $B$  and the Neel vector along the  $z$  axis to describe such a system. Three elements in the spin space group were considered, including a 2-fold spin rotation perpendicular to the magnetic moment followed by a fractional translation symmetry,  $U_x^{1/2} = \{U_x(\pi) \parallel E \mid \tau_{1/2}\}$ ,  $U_y^{1/2}$  and a spin rotation operation along magnetic moments with an infinitesimal rotation angle,  $\{U_z(\theta) \parallel E \mid 0\}$ , where  $U_n(\theta)$ , represents pure spin rotation  $\theta$  along  $n$  axis and  $\tau_{1/2}$  denotes the half translation along the  $z$  axis (see Note S2). We can write the general form of the single-electron Hamiltonian as  $H(\mathbf{k}) = \sum_{i,j=0,x,y,z} f_{ij}(\mathbf{k}) \tau_i \otimes \sigma_j$ , where  $\sigma$  and  $\tau$  operate on spin and site degrees of freedom, respectively, and  $f_{ij}(\mathbf{k})$  represents real functions of  $\mathbf{k}$ . After that,

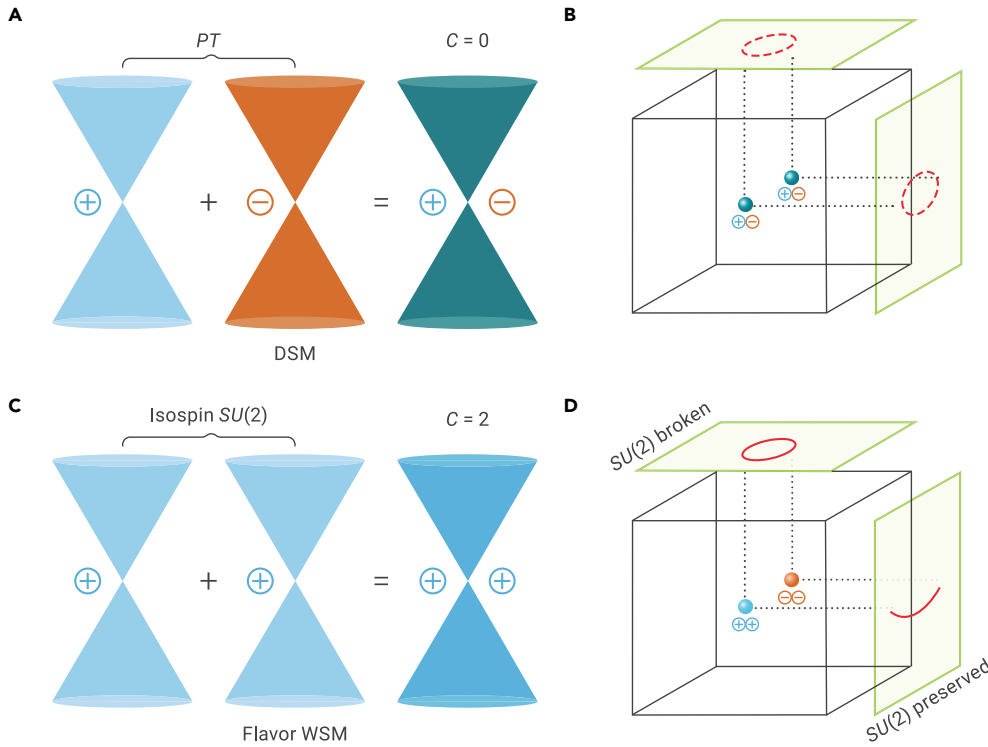

**Figure 1. Schematics of the Dirac semimetal (DSM) and flavor Weyl semimetal (flavor WSM)** (A) A Dirac point can be viewed as the superposition of two Weyl points with opposite chirality in a DSM. Such superposition is generally obtained by the space-time  $PT$  symmetry. (B) The surface states of the DSM are adiabatically connected to topologically trivial surface states. The green points denote the Dirac points. (C) A flavor WSM hosts 4-fold degenerate points composed of two Weyl points with identical chirality, protected by a hidden  $SU(2)$  symmetry group (analogous to the isospin symmetry in particle physics). (D) The surface states of flavor WSM are robust owing to the protection of chiral charges. The surface states on the surfaces that preserve the  $SU(2)$  symmetry are 2-fold degenerate connecting two flavor Weyl points with opposite chirality. However, the surface states on the surfaces with a broken  $SU(2)$  symmetry group split into two spin-polarized branches, resembling conventional topological insulators or semimetals.

the elements can be represented as  $u_x^{1/2} = -ie^{-ik\cdot\tau_{1/2}\tau_x} \otimes \sigma_x$ ,  $u_y^{1/2} = -ie^{-ik\cdot\tau_{1/2}\tau_y} \otimes \sigma_y$ , and  $\{U_z(\theta)|E|0\rangle = \tau_0 \otimes e^{-i\theta\sigma_z}$ . We applied these symmetry constraints to the Hamiltonian  $H(\mathbf{k})$  and obtained the following equation:

$$H(\mathbf{k}) = d_0(\mathbf{k})\alpha^0 + \sum_{i=1,2,3} d_i(\mathbf{k})\alpha^i, \quad (\text{Equation 1})$$

where  $d_0(\mathbf{k})$  and  $d_i(\mathbf{k})$  represent real functions of  $\mathbf{k}$ ,  $\alpha^0 = \tau_0 \otimes \sigma_0$  and  $\alpha^i = (\tau_x \otimes \sigma_0, \tau_y \otimes \sigma_z, \tau_z \otimes \sigma_x)$ . Moreover,  $\alpha^i$  satisfies the anticommutation relation,  $\{\alpha^i, \alpha^j\} = 2\delta_{ij}$ , which guarantees a 2-fold degeneracy. It permits the possible flavor Weyl points occurring at generic momenta when  $d_i(\mathbf{k}) = 0$  for all  $i$ . Particularly, the two Weyl cones, with the basis  $\{|A, \uparrow\rangle, |B, \uparrow\rangle\}$  and  $\{|B, \downarrow\rangle, |A, \downarrow\rangle\}$ , are degenerate due to  $u_x^{1/2}$  symmetry.

While Equation 1 does not have  $SU(2)$  rotation symmetry of the Neel vector, there is a hidden  $SU(2)$  symmetry protecting the flavor WSM phase. To elucidate this, we show the existence of a symmetry group with the group elements written as  $\exp(-i\theta\mathbf{n}\cdot\boldsymbol{\rho})$ , where  $\theta$ ,  $\mathbf{n}$  and  $\boldsymbol{\rho}$  represent the rotation angle, rotation axis, and three-vector of the generators of  $SU(2)$  group, respectively. The generators can be constructed proportional to the representations of  $u_x^{1/2}$ ,  $u_y^{1/2}$ , and  $\{U_z(\pi)|E|0\rangle$ , i.e.,  $\boldsymbol{\rho} = (\frac{1}{2}\tau_x \otimes \sigma_x, \frac{1}{2}\tau_x \otimes \sigma_y, \frac{1}{2}\tau_0 \otimes \sigma_z)$ . Since  $\rho_i$  satisfies Pauli algebra, the group  $\{\exp(-i\theta\mathbf{n}\cdot\boldsymbol{\rho})\}$  is isomorphic to an  $SU(2)$  symmetry group. Such an  $SU(2)$  symmetry transforms the two Weyl cones  $\{|A, \uparrow\rangle, |B, \uparrow\rangle\}$  and  $\{|B, \downarrow\rangle, |A, \downarrow\rangle\}$ , to their arbitrary linear combinations, as shown in Figure 2B. Since the Hamiltonian Equation 1 can be diagonalized into spin-up and spin-down blocks, such  $SU(2)$  group mixes spin-up and spin-down Weyl fermions to their linear combinations. This implies that the spin-up and spin-down Weyl fermions must have the same chirality, rendering the role of the  $SU(2)$  symmetry as isospin symmetry connecting two Weyl fields with the same chirality.

The  $SU(2)$  symmetry transforms spin and sublattice degrees of freedom simultaneously, leading to two degenerate states with distinct spatial wave functions differentiated by a sublattice transformation. Consequently, the surface spectra could be either nondegenerate or degenerate, depending on whether the surfaces break the sublattice transformation symmetry  $u_x^{1/2}$  (Figure 1D). Thus, the  $SU(2)$  symmetry presented in our spinful model is drastically different from the trivial  $SU(2)$  spin rotation in nonmagnetic materials without SOC, which also supports charge-2 Weyl fermions by directly multiplying the spin index onto a spinless Weyl model.<sup>31</sup> Moreover, the flavor WSM protected by hidden  $SU(2)$

collinear AFM systems without the protection of any additional symmetry except  $u_x^{1/2}$ . A perturbation to  $H(\mathbf{k})$ —that does not break  $u_x^{1/2}$  or  $U_z(\theta)$ —typically shifts the position of the flavor Weyl point without opening a gap, resembling the case of Weyl semimetals.

### Material realization: CoNb<sub>3</sub>S<sub>6</sub>

To realize flavor WSM in realistic materials, we first summarize the required conditions as following design principles: (1) collinear AFM order, (2) broken  $P$  and  $PT$  symmetry, and (3) presence of  $\{T|\tau_{1/2}\}$  symmetry. We note that (1) and (3) ensure the presence of spin-group symmetry  $u_{x/y}^{1/2}$  and  $U_z(\theta)$  without SOC. Based on these principles, we propose that the chiral transition-metal chalcogenide CoNb<sub>3</sub>S<sub>6</sub> is a representative flavor WSM that hosts flavor Weyl points around the Fermi level. Based on these principles, we survey magnetic database in Bilbao server and find 443 crystalline materials (out of 1,605 entries) that could host  $SU(2)$  isospin symmetry; 62 of them could have flavor Weyl points when turning off SOC (see Note S4 for the full list and the calculation of another material candidate GdCuSn). Among them, transition-metal chalcogenide CoNb<sub>3</sub>S<sub>6</sub> is a representative flavor WSM that hosts flavor Weyl points around the Fermi level. Figure 3A shows that CoNb<sub>3</sub>S<sub>6</sub> crystallizes in the chiral space group  $P6_322$ .<sup>32</sup> It has an AFM order with magnetic moments directed along a crystal axis within the  $a$ - $b$  plane below the Neel temperature,  $T_N$ , of  $\sim 26$  K.<sup>33</sup> This structure corresponds to the type-IV magnetic space group  $P_B2_12_12$  (No. 18.22). It has one 2-fold rotation along the  $x$  axis  $\{U_x(\pi)|C_x(\pi)|0\rangle$ , two screw rotations  $\{U_y(\pi)|C_y(\pi)|\tau_{(b+c)/2}\}$  and  $\{U_z(\pi)|C_z(\pi)|\tau_{(b+c)/2}\}$ , and nonsymmorphic time-reversal  $\{T|\tau_{(a+b)/2}\}$ , as per the notation of spin space groups. Some symmetry operations beyond the conventional magnetic space group, including  $\{E|C_x(\pi)|0\rangle$  and  $\{TU_n(\pi)|E|0\rangle$  ( $\mathbf{n} = \cos\varphi\hat{y} + \sin\varphi\hat{z}$ ,  $\varphi \in (0, \pi]$ ), are permitted without SOC, forming the spin space group  $P_B^12_112_12^{\infty m1}$  (see Note S3).

In contrast to the previous calculations using nonmagnetic or alternative AFM configurations,<sup>34,35</sup> we adopt the experimental magnetic configuration observed by neutron scattering.<sup>33</sup> The band structure calculation (Figure 3C) shows that CoNb<sub>3</sub>S<sub>6</sub> is a metal with multiple hole pockets near the  $\Gamma$  point, consistent with the experiments showing holes as major system carriers (see materials and methods for details about density functional theory [DFT] calculation).<sup>34</sup> The symmetry properties guarantee the following topological features that appear in the band structure. First, the spin space group does not have  $P$ .

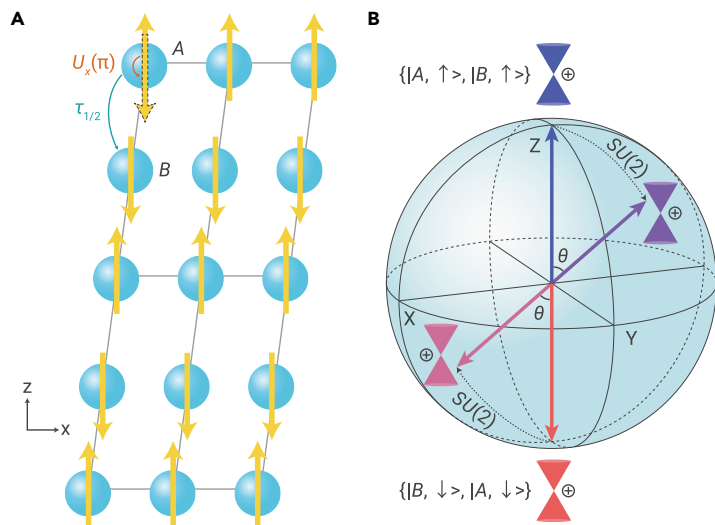

**Figure 2. Hidden  $SU(2)$  symmetry in antiferromagnetic materials** (A) The magnetic lattice with collinear antiferromagnetic order allows spin-group symmetry operations,  $\{U_x(\pi)|E|\tau_{1/2}\}$  and  $\{U_z(\theta)|E|0\}$  without spin-orbit coupling, leading to two degenerate Weyl cones with the basis  $\{|A, \uparrow\rangle, |B, \uparrow\rangle\}$  and  $\{|B, \downarrow\rangle, |A, \downarrow\rangle\}$  and an  $SU(2)$  symmetry group  $\exp(-i\theta\mathbf{n}\cdot\boldsymbol{\rho})$  (see the main text). (B) Bloch sphere of the  $SU(2)$  symmetry group, transforming the basis of a Weyl cone  $\{|A, \uparrow\rangle, |B, \uparrow\rangle\}$  (blue arrow) to any linear combinations (up to a phase factor)  $\{\alpha|A, \uparrow\rangle + \beta|B, \downarrow\rangle, \alpha|B, \uparrow\rangle + \beta|A, \downarrow\rangle\}$ , and transforming  $\{|B, \downarrow\rangle, |A, \downarrow\rangle\}$  (red arrow) to an orthogonal one  $\{-\beta^*|A, \uparrow\rangle + \alpha^*|B, \downarrow\rangle, -\beta^*|B, \uparrow\rangle + \alpha^*|A, \downarrow\rangle\}$ . The basis transformation under the rotation axis (gray line)  $\mathbf{n} = (\cos(\omega), \sin(\omega), 0)$  and rotation angle  $\theta$  are also shown. The mixing coefficients are  $\alpha = \cos[\theta/2]$  and  $\beta = -i\sin[\theta/2]e^{-i\omega}$ .

However, it has  $u_z^{1/2} = \{U_z(\pi)|E|\tau_{(a+b)/2}\}$  and  $\{U_x(\theta)|E|0\}$ , ensuring doubly degenerate bands for flavor WSM. Second, the 2-fold spatial rotations decoupled to spin rotations— $\{E|C_x(\pi)|0\}$ ,  $\{E|C_y(\pi)|\tau_{(a+c)/2}\}$  and  $\{E|C_z(\pi)|\tau_{(a+c)/2}\}$ —commute with  $u_z^{1/2}$  along the  $\Gamma - X$ ,  $\Gamma - Y$ , and  $\Gamma - Z$  lines, ensuring that the two degenerate energy bands have identical rotation eigenvalues on the high-symmetry lines. Therefore, the three 2-fold rotation operations can provide additional protection for flavor Weyl points. We note that although  $\text{CoNb}_3\text{S}_6$  belongs to chiral space group, implying that all point-like degeneracies are chiral fermions, the occurrence of flavor Weyl nodes does not require a chiral space group in general.<sup>36</sup>

Remarkably, there are multiple flavor Weyl points around the Fermi level and four flavor Weyl points at  $\sim 0.7$  eV above the Fermi level. The latter points are located along  $\Gamma - X$  and  $\Gamma - Y$  lines. We found that the crossing bands along these high-symmetry lines have opposite eigenvalues of  $\{E|C_x(\pi)|0\}$  or  $\{E|C_y(\pi)|\tau_{(a+c)/2}\}$ , indicating that the flavor Weyl points are protected by  $C_2$  rotation. The Berry curvature calculation (see Figure 3D) shows that the two Weyl points along  $(-X) - \Gamma - X$  act as the source of Berry curvature, and the other two act as the drain, manifesting their chiral nature. Further calculation of the Wilson loop showed that the Chern number over a spherical surface around a Weyl point along  $\Gamma - X(Y)$  was  $-2$  ( $+2$ ) (see Figure S1). Therefore, we name the flavor Weyl points along  $\Gamma - X(Y)$  as  $N_1, N_2$  ( $P_1, P_2$ ). We obtained the Dirac-like  $k\cdot p$  Hamiltonian in the following by applying the symmetry operations,  $u_z^{1/2}$ ,  $U_x(\theta)$  and  $\{T|C_z(\pi)|\tau_{(b+c)/2}\}$ , to the low-energy Hamiltonian near  $N_1$ :

$$H(k) = (a_0 + a_1k_x)\tau_x \otimes \sigma_0 + (a_3k_z)\tau_y \otimes \sigma_x + (a_4k_x)\tau_z \otimes \sigma_x \quad (\text{Equation 2})$$

The results of our DFT calculation can be used to obtain the parameters of Equation 2, giving rise to an anisotropic Dirac cone. By implementing the spin rotation  $e^{-i1/2(\pi/2)\sigma_y}$  to Equation 2 (transforming  $\sigma_x$  terms into  $\sigma_z$  terms), the Hamiltonian is block-diagonalized into two Weyl Hamiltonians of the same chirality.

The topological charges of the flavor WSM imply the existence of Fermi arc surface states connecting two flavor Weyl points with opposite chirality. However, flavor Weyl points with opposite chirality are not connected by any symmetry owing to the lack of inversion, roto-inversion and their combinations with  $T$ . Therefore, we found an energy difference of 87 meV between  $P_1$  and  $N_1$ . Moreover, fla-

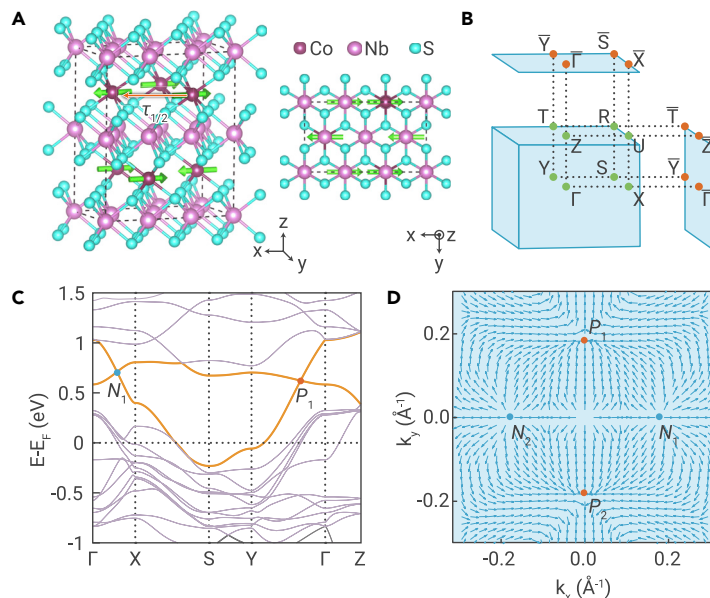

**Figure 3. Crystal and bulk electronic properties of  $\text{CoNb}_3\text{S}_6$**  (A) The crystal structure of  $\text{CoNb}_3\text{S}_6$ . (B) Bulk and surface Brillouin zones of  $\text{CoNb}_3\text{S}_6$ . (C) The band structure of  $\text{CoNb}_3\text{S}_6$  without spin-orbit coupling. There are two flavor Weyl points at  $\sim 0.7$  eV above the Fermi level,  $N_1$  and  $P_1$ , and another two flavor Weyl points,  $N_2$  and  $P_2$  (not shown), that are connected to  $N_1$  and  $P_1$  through 2-fold rotation. (D) Distribution of in-plane components of tetraher of Berry curvature tensor on  $k_x = 0$  plane, where  $N_1/N_2$  and  $P_1/P_2$  denote the source and sink, respectively.

vor Weyl points,  $P_1$  and  $P_2$  ( $N_1$  and  $N_2$ ), are connected by a 2-fold spatial rotation. Hence, they are located at the same energy. There are two disconnected electron Fermi pockets, separately enclosing  $P_1$  and  $P_2$ , and two disconnected hole pockets, separately enclosing  $N_1$  and  $N_2$ , for the (001) surface when Fermi energy exists between the two. Every electron pocket is connected to a hole pocket by a branch of Fermi arc surface states due to the enclosure of the different topological charges in electron and hole pockets, forming a network across the Brillouin zone (see Figure 4A). Interestingly, the surface states are also doubly degenerate because  $\{U_z(\pi)|E|\tau_{(a+b)/2}\}$  is preserved on this surface (and so as the hidden  $SU(2)$  symmetry), in sharp contrast to the conventional topological insulators or DSMs where the surface bands are spin-polarized and nondegenerate. The degenerate Fermi arc surface states are split into two branches for the (100) surface with broken symmetry of  $\{U_z(\pi)|E|\tau_{(a+b)/2}\}$ , as shown in Figure 4B. The various Fermi arc surface states are robust against perturbations, maintaining the collinear A-type AFM order in the absence of SOC. On the contrary, topological protection for the surface states on the conventional DSM does not exist.<sup>37</sup>

The Chern number of a 2D slice in the Brillouin zone changed in the multiples of 2 because the flavor Weyl points have chiralities of  $\pm 2$ . Figure 4C shows that the Chern number of the slice perpendicular to the x axis changes as a function of  $k_y$ . The Chern number calculated on slice near  $\Gamma$ —between flavor Weyl points with opposite chirality—is  $\pm 2$ . The result is consistent with the Berry curvature calculation (Figure 3D), where Berry curvature flows from  $N_1$  and  $N_2$  to  $P_1$  and  $P_2$ . Figure 4D shows the corresponding edge states with two branches of chiral surface states connecting the conduction and valence bands that are doubly degenerate at  $SU(2)$ -preserved edge and nondegenerate at  $SU(2)$ -broken edge, further validating the interplay between the Weyl points and the hidden  $SU(2)$  symmetry. We note that the energies of the flavor Weyl points  $P_{1,2}$  and  $N_{1,2}$  ( $\sim 0.7$  eV) depend on the  $U$  value (3 eV) of Co-3d electrons we adopt for correlation effects. When  $U$  is set to 1 eV, the energies of these points shift to  $\sim 0.5$  eV, whose Fermi arc states might be observed by angle-resolved photoemission spectroscopy.

### Effects of SOC

While SOC is a universal relativistic property existing in all materials, for most materials, even with strong SOC, e.g., 10 to 100 meV, its influence on the electronic structure is still limited compared with those caused by exchange splitting and crystal field, etc. Therefore, we can take the SOC-free Hamiltonian, which is described by spin-group symmetry, as a good starting point to understand magnetic materials with SOC by treating SOC as a

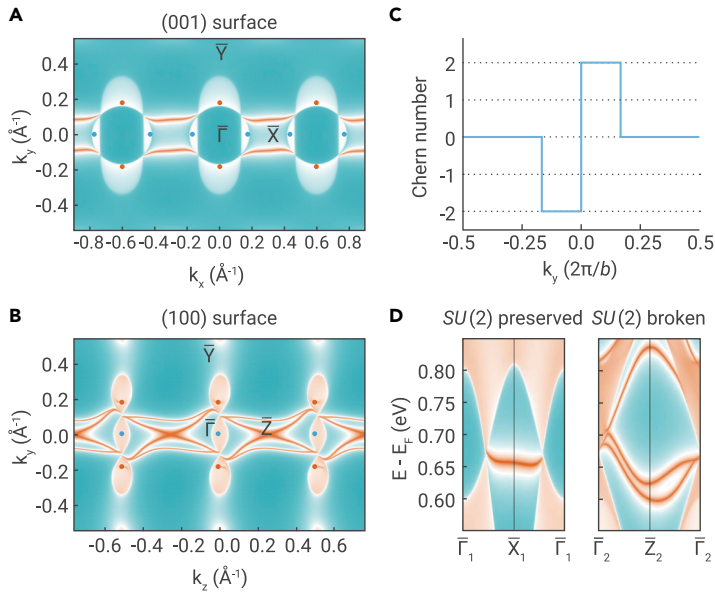

**Figure 4. Protected topological surface states of flavor WSM  $\text{CoNb}_3\text{S}_6$**  (A and B) Iso-energy surface states connect electron pockets and hole pockets, separately enclosing flavor Weyl points with opposite chirality on (001) and (100) surfaces of  $\text{CoNb}_3\text{S}_6$ . (C) The transition of Chern number defined on 2D slices in the Brillouin zone perpendicular to the y axis as a function of momentum  $k_y$ . (D) Chiral edge states of the 2D slice ( $k_y = 0.1 (2\pi/b)$ ) with Chern number of 2. Doubly degenerate edge bands are found in  $SU(2)$ -preserved edge, while spin-polarized nondegenerate edge bands are found in  $SU(2)$ -broken edge. The notations are defined as  $\bar{\Gamma}_1 = \bar{\Gamma} + \bar{P}$ ,  $\bar{X}_1 = \bar{X} + \bar{P}$ ,  $\bar{\Gamma}_2 = \bar{\Gamma} + \bar{P}$ , and  $\bar{Z}_2 = \bar{Z} + \bar{P}$ , where  $\bar{P} = \frac{1}{3}(\bar{Y} - \bar{T})$ .

perturbation that breaks certain spin-group symmetries. Specifically, since the flavor Weyl points are charge-2 monopoles of Berry curvature, the sub-Hilbert space on a spherical surface encircling a flavor Weyl point should be a Chern insulator with Chern number  $\pm 2$ , which cannot be changed under any sort of symmetry-breaking perturbation, unless a gap-closing occurs in this sub-Hilbert space. Therefore, when SOC is included, although doubly degenerate bands split due to the broken  $SU(2)$  isospin symmetry, the flavor Weyl point undergoes a phase transition to a twin-pair of conventional Weyl points with the same chirality rather than being gapped immediately.

We next study the modification of band dispersions in  $\text{CoNb}_3\text{S}_6$ , which depends on the specific bands and wavevectors, by turning on SOC. Figure 5A shows that the energy bands contributing to flavor Weyl points  $P_{1,2}$  and  $N_{1,2}$

have moderate spin splitting about 20 meV, while Figure 5D shows that most energy bands near the Fermi level have relatively small spin splitting ( $< 10$  meV) in the presence of SOC. Thus, the SOC effects of the flavor Weyl points have two different manifestations, i.e., a twin-pair of Weyl points or fully gapped. For  $P_{1,2}$  and  $N_{1,2}$  (Figure 5A), because of the small energy gap around the loop in the Brillouin zone passing these flavor Weyl points in the absence of SOC, SOC is large enough to gap these Weyl points. However, despite the gapped phase and spin-split surface states, the features of Fermi arc still resemble those without SOC, as shown in Figures 5B and 5C. The difference is that the Fermi arc surface states are now trivial rather than nontrivial, connecting an electron (hole) pocket with an electron (hole) pocket. Recall the successful measurement of the Fermi arc states in DSMs, such spin-group-induced feature could also be visible for experiments. For flavor Weyl points near the Fermi level (Figure 5D), small spin splitting causes some flavor Weyl points to split into twin-pair Weyl points rather than being gapped, as shown in Figures 5E and 5F. The spin splitting at the Weyl points is only  $\sim 3$  meV, which is a small perturbation to the flavor Weyl points protected by spin group.<sup>38–41</sup>

Overall, even if SOC effect is generally not negligible in  $\text{CoNb}_3\text{S}_6$ , the flavor WSM phases can still be considered as a starting point to understand its topological nature that cannot be fully described by magnetic space group. Interestingly, the SOC-free approximation of the flavor symmetry studied here also makes a nice analogy to the flavor symmetry in particle physics, which is also an approximate symmetry. Recall that isospin symmetry is good enough in prediction of the possibility and rates of nuclear reaction when the masses of the two particles, e.g., proton (938.27 MeV) and neutron (939.57 MeV), are similar, spin-group symmetry protects degeneracies, topological charges, and surface states of certain topological materials when SOC is weak.<sup>42</sup>

## DISCUSSION

We discuss the possible experimental phenomena associated with flavor Weyl fermions. First, flavor WSM manifests unique and robust surface states enforced by topological charges. On  $SU(2)$  preserved surfaces, the surface states would be Weyl-like, while on  $SU(2)$  breaking surfaces, the surface states would be Dirac-like. In contrast, robust surface states of DSMs are rare except for specific nonsymmorphic symmetries to protect the surface states.<sup>37,43</sup> Owing to the protection of topological charge, even if sizable SOC exists, flavor Weyl points could be split into a twin-pair of conventional Weyl points with the same chirality rather than being gapped immediately. These characteristics are potentially observable by angle-resolved photoemission spectroscopy.

More importantly, the robust Fermi arc surface states of flavor WSM potentially lead to unexplored emergent transport and optical properties. For example, the flavor Weyl points of opposite chirality in  $\text{CoNb}_3\text{S}_6$  do not lie at the same energy, possibly leading to a large and quantized response to circularly polarized light.<sup>44</sup>

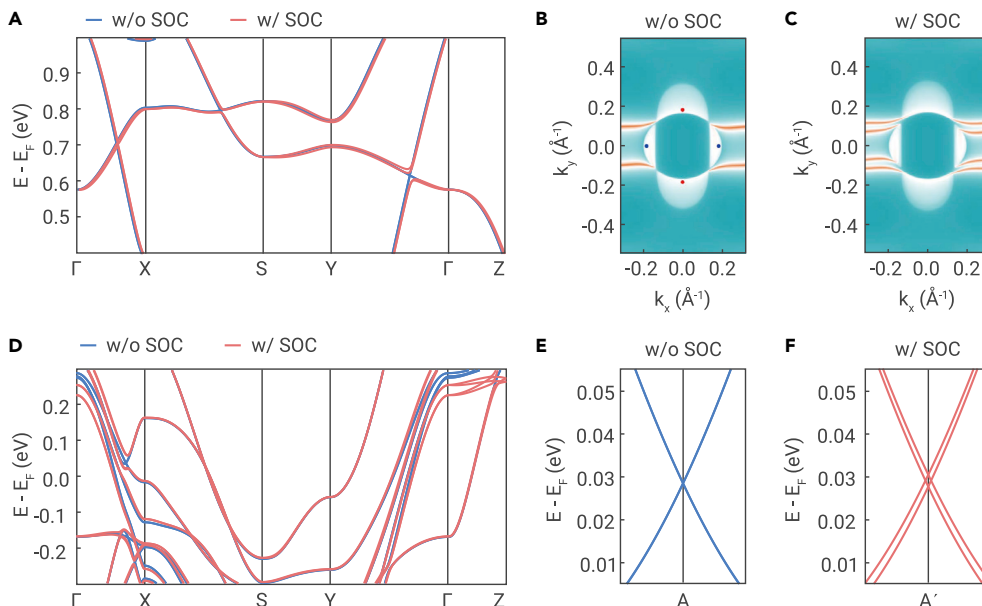

**Figure 5. Effects of spin-orbit coupling on energy bands** (A) Band structure around the energies of  $N_1$  and  $P_1$ . (B and C) Iso-energy topological surface states without SOC (B) and with SOC (C). The energy is set between those of  $N_1$  and  $P_1$ . (D) Band structure around the Fermi level. (E and F) Zoom-in bands of a flavor Weyl point without SOC (E) and with SOC (F). The coordinate of points labeled are  $A = (0.5, 0.2572, 0)$ ,  $A' = (0.5, 0.2575, 0)$ ,  $\delta = (0.05, 0, 0)$ .

Furthermore, the net anomalous Hall conductivity and spin Hall conductivity in  $\text{CoNb}_3\text{S}_6$  should be zero owing to the presence of  $\{T||E|\tau_{1/2}\}$  symmetry and  $\{T||U_n(\pi)|0\}$  symmetry. However, breaking  $\{T||E|\tau_{1/2}\}$  symmetry and  $\{T||U_n(\pi)|0\}$  symmetry through the small SOC effect and small tilting of magnetic moments may lead to a large anomalous Hall conductance because of the uncompensated Berry curvature and multiple Fermi arcs emerging from the charge-2 flavor Weyl points. It has been observed in  $\text{CoNb}_3\text{S}_6$ , accompanied by small out-of-plane components of the magnetic moments.<sup>34</sup>

Poincaré symmetry is generally broken in solid-state lattices, while certain crystalline symmetries such as nonsymmorphic symmetry are absent in high-energy physics. Because of these differences, there are various types of quasiparticle excitation in condensed matter physics that do not have counterparts in high-energy physics, including 3-, 6- or 8-fold degenerate points,<sup>45,46</sup> line-like,<sup>47–49</sup> chain-like,<sup>50,51</sup> and plane-like band crossings,<sup>52</sup> etc. Besides, there are also emergent quasiparticles composed of two Weyl points of opposite chirality, like Dirac fermions, but with different velocities, indicating that energy bands around the 4-fold degenerate points are generally nondegenerate.<sup>53,54</sup> We note that such quasiparticles sometimes are also attributed to a type of DSM with a looser definition, which allows band splitting around Dirac points.<sup>5</sup> In addition, previous literature also reported four-component Weyl fermions with nonzero Chern number  $\pm 2$  or  $\pm 4$ , in both electron<sup>5,22,23,55–57</sup> and phonon systems.<sup>58,59</sup> We note that the main difference between these quasiparticles and the flavor Weyl fermions in the presented work is 2-fold. First, these quasiparticles are stabilized by the little groups with high-order rotation operations or the little groups with nonsymmorphic symmetry operations. Therefore, these elementary excitations can only appear at specific high-symmetry momenta of the Brillouin zone. However, the flavor Weyl points can appear at generic momenta. This property implies the emergence of dense flavor Weyl points within a small energy range, possibly leading to stronger topological effects. Second, the previously studied 4-fold degenerate points with nonzero Chern number inevitably have nondegenerate energy bands away from the high-symmetry points. Therefore, they do not strictly fulfill the massless four-component equation in quantum field theory. However, our flavor WSM model was derived from the quantum field theory perspective with doubly degenerate dispersions around the Dirac-like points, stabilized by the hidden  $SU(2)$  isospin symmetry.

## MATERIALS AND METHODS

The first-principles calculations were carried out using projector-augmented-wave (PAW) method<sup>60</sup>, implemented in Vienna ab initio simulation package (VASP)<sup>61</sup> within the framework of density-functional theory<sup>62,63</sup>. Contributions of exchange and correlation effects were accounted by the generalized gradient approximation (GGA) with the Perdew-Burke-Ernzerhof (PBE) formalism<sup>64,65</sup>. An energy cut off of 520 eV is used in our calculations. The whole Brillouin-zone was sampled by  $5 \times 8 \times 4$  Monkhorst-Pack grid<sup>66</sup> for all cells. Due to the local magnetic moments contributed from 3d electrons in Co atoms, GGA+U approach<sup>67</sup> within the Dudarev scheme<sup>68</sup> is applied and we set the U on Co to be 3 eV, which produces local magnetic moments of  $2.2 \mu_B$  consisting well with the experiments<sup>69</sup>. A tight-binding Hamiltonian is obtained based on maximally localized Wannier functions<sup>70,71</sup> of Co-3d, Nb-4d, S-3p orbitals, from which the topological surface states, Berry curvature and Chern number are calculated. The iterative Green's function implemented in WannierTools package is used for surface states calculations<sup>72</sup>.

## REFERENCES

- Novoselov, K.S., Geim, A.K., Morozov, S.V., et al. (2005). Two-dimensional gas of massless Dirac fermions in graphene. *Nature* **438**, 197–200.
- Fu, L., Kane, C.L., and Mele, E.J. (2007). Topological insulators in three dimensions. *Phys. Rev. Lett.* **98**, 106803.
- Moore, J.E., and Balents, L. (2007). Topological invariants of time-reversal-invariant band structures. *Phys. Rev. B* **75**, 121306.
- Wang, P., Ge, J., Li, J., et al. (2021). Intrinsic magnetic topological insulators. *Innovation* **2**, 100098.
- Young, S.M., Zaheer, S., Teo, J.C.Y., et al. (2012). Dirac semimetal in three dimensions. *Phys. Rev. Lett.* **108**, 140405.
- Yang, B.-J., and Nagaosa, N. (2014). Classification of stable three-dimensional Dirac semimetals with nontrivial topology. *Nat. Commun.* **5**, 4898.
- Young, S.M., and Kane, C.L. (2015). Dirac semimetals in two dimensions. *Phys. Rev. Lett.* **115**, 126803.
- Wan, X., Turner, A.M., Vishwanath, A., and Savrasov, S.Y. (2011). Topological semimetal and fermi-arc surface states in the electronic structure of pyrochlore iridates. *Phys. Rev. B* **83**, 205101.
- Fang, C., Gilbert, M.J., Dai, X., and Bernevig, B.A. (2012). Multi-Weyl topological semimetals stabilized by point group symmetry. *Phys. Rev. Lett.* **108**, 266802.
- Armitage, N.P., Mele, E.J., and Vishwanath, A. (2018). Weyl and Dirac semimetals in three-dimensional solids. *Rev. Mod. Phys.* **90**, 015001.
- Wang, Z., Sun, Y., Chen, X.-Q., et al. (2012). Dirac semimetal and topological phase transitions in  $\text{A}_3\text{Bi}$  (A = Na, K, Rb). *Phys. Rev. B* **85**, 195320.
- Wang, Z., Weng, H., Wu, Q., et al. (2013). Three-dimensional Dirac semimetal and quantum transport in  $\text{Cd}_3\text{As}_2$ . *Phys. Rev. B* **88**, 125427.
- Liu, Z.K., Jiang, J., Zhou, B., et al. (2014). A stable three-dimensional topological Dirac semimetal  $\text{Cd}_3\text{As}_2$ . *Nat. Mater.* **13**, 677–681.
- Liu, Z.K., Zhou, B., Zhang, Y., et al. (2014). Discovery of a three-dimensional topological Dirac semimetal,  $\text{Na}_3\text{Bi}$ . *Science* **343**, 864–867.
- Tang, P., Zhou, Q., Xu, G., and Zhang, S.-C. (2016). Dirac fermions in an antiferromagnetic semimetal. *Nat. Phys.* **12**, 1100–1104.
- Wang, J. (2017). Antiferromagnetic Dirac semimetals in two dimensions. *Phys. Rev. B* **95**, 115138.
- Hua, G., Nie, S., Song, Z., et al. (2018). Dirac semimetal in type-IV magnetic space groups. *Phys. Rev. B* **98**, 201116.
- Watanabe, H., Po, H.C., and Vishwanath, A. (2018). Structure and topology of band structures in the 1651 magnetic space groups. *Sci. Adv.* **4**, eaat8685.
- Xu, Y., Elcoro, L., Song, Z.-D., et al. (2020). High-throughput calculations of magnetic topological materials. *Nature* **586**, 702–707.
- Elcoro, L., Wieder, B.J., Song, Z., et al. (2021). Magnetic topological quantum chemistry. *Nat. Commun.* **12**, 5965.
- Peng, B., Jiang, Y., Fang, Z., et al. (2022). Topological classification and diagnosis in magnetically ordered electronic materials. *Phys. Rev. B* **105**, 235138.
- Yu, Z.-M., Zhang, Z., Liu, G.-B., et al. (2022). Encyclopedia of emergent particles in three-dimensional crystals. *Sci. Bull.* **67**, 375–380.
- Tang, F., and Wan, X. (2021). Exhaustive construction of effective models in 1651 magnetic space groups. *Phys. Rev. B* **104**, 085137.
- Brinkman, W.F., and Elliott, R.J. (1966). Theory of spin-space groups. *Proc. R. Soc. A* **294**, 343–358.
- Litvin, D.B., and Opechowski, W. (1974). Spin groups. *Physica* **76**, 538–554.
- Liu, P., Li, J., Han, J., et al. (2022). Spin-group symmetry in magnetic materials with negligible spin-orbit coupling. *Phys. Rev. X* **12**, 021016.
- Yang, J., Liu, Z.-X., and Fang, C. (2021). Symmetry invariants of spin space groups in magnetic materials. Preprint at arXiv. <https://doi.org/10.48550/arXiv.2105.12738>.
- Corticelli, A., Moessner, R., and McClarty, P.A. (2022). Spin-space groups and magnon band topology. *Phys. Rev. B* **105**, 064430.
- Coleman, S., and Mandula, J. (1967). All possible symmetries of the S matrix. *Phys. Rev.* **159**, 1251–1256.
- Heisenberg, W. (1932). Über den bau der atomkerne. I. *Z. Physik* **77**, 1–11.
- Chang, G., Xu, S.-Y., Sanchez, D.S., et al. (2016). A strongly robust type II Weyl fermion semimetal state in  $\text{Ta}_3\text{S}_2$ . *Sci. Adv.* **2**, e1600295.
- Anzenhofer, K., Van Den Berg, J.M., Cossee, P., and Helle, J.N. (1970). The crystal structure and magnetic susceptibilities of  $\text{MnNb}_3\text{S}_6$ ,  $\text{FeNb}_3\text{S}_6$ ,  $\text{CoNb}_3\text{S}_6$  and  $\text{NiNb}_3\text{S}_6$ . *J. Phys. Chem. Solids* **31**, 1057–1067.
- Parkin, S.S.P., Marsaglia, E.A., and Brown, P.J. (1983). Magnetic structure of  $\text{Co}_{1/3}\text{NbS}_2$  and  $\text{Co}_{1/3}\text{TaS}_2$ . *J. Phys. C Solid State Phys.* **16**, 2765–2778.
- Ghimire, N.J., Botana, A.S., Jiang, J.S., et al. (2018). Large anomalous hall effect in the chiral-lattice antiferromagnet  $\text{CoNb}_3\text{S}_6$ . *Nat. Commun.* **9**, 3280.
- Šmejkal, L., González-Hernández, R., Jungwirth, T., and Sinova, J. (2020). Crystal time-reversal symmetry breaking and spontaneous hall effect in collinear antiferromagnets. *Sci. Adv.* **6**, eaaz8809.
- Chang, G., Wieder, B.J., Schindler, F., et al. (2018). Topological quantum properties of chiral crystals. *Nat. Mater.* **17**, 978–985.
- Kargarian, M., Randeria, M., and Lu, Y.-M. (2016). Are the surface fermi arcs in Dirac semimetals topologically protected? *Proc. Natl. Acad. Sci. USA* **113**, 8648–8652.
- Yi, H., Wang, Z., Chen, C., et al. (2014). Evidence of topological surface state in three-dimensional Dirac semimetal  $\text{Cd}_3\text{As}_2$ . *Sci. Rep.* **4**, 6106.
- Xu, S.-Y., Liu, C., Kushwaha, S.K., et al. (2015). Observation of fermi arc surface states in a topological metal. *Science* **347**, 294–298.
- Moll, P.J.W., Nair, N.L., Helm, T., et al. (2016). Transport evidence for fermi-arc-mediated chirality transfer in the Dirac semimetal  $\text{Cd}_3\text{As}_2$ . *Nature* **535**, 266–270.
- Wu, Y., Jo, N.H., Wang, L.-L., et al. (2019). Fragility of fermi arcs in Dirac semimetals. *Phys. Rev. B* **99**, 161113.
- Zee, A. (2016). *Group Theory in a Nutshell for Physicists* (Princeton University Press).
- Fang, C., Lu, L., Liu, J., and Fu, L. (2016). Topological semimetals with helicoid surface states. *Nat. Phys.* **12**, 936–941.
- de Juan, F., Grushin, A.G., Morimoto, T., and Moore, J.E. (2017). Quantized circular photogalvanic effect in Weyl semimetals. *Nat. Commun.* **8**, 15995.
- Bradlyn, B., Cano, J., Wang, Z., et al. (2016). Beyond Dirac and Weyl fermions: unconventional quasiparticles in conventional crystals. *Science* **353**, aaf5037.
- Wieder, B.J., Kim, Y., Rappe, A.M., and Kane, C.L. (2016). Double Dirac semimetals in three dimensions. *Phys. Rev. Lett.* **116**, 186402.
- Burkov, A.A., Hook, M.D., and Balents, L. (2011). Topological nodal semimetals. *Phys. Rev. B* **84**, 235126.

48. Fang, C., Chen, Y., Kee, H.-Y., and Fu, L. (2015). Topological nodal line semimetals with and without spin-orbital coupling. *Phys. Rev. B* **92**, 081201.
49. Kim, Y., Wieder, B.J., Kane, C.L., and Rappe, A.M. (2015). Dirac line nodes in inversion-symmetric crystals. *Phys. Rev. Lett.* **115**, 036806.
50. Bzdušek, T., Wu, Q., Rüegg, A., et al. (2016). Nodal-chain metals. *Nature* **538**, 75–78.
51. Wu, Q., Soluyanov, A.A., and Bzdušek, T. (2019). Non-abelian band topology in noninteracting metals. *Science* **365**, 1273–1277.
52. Wu, W., Liu, Y., Li, S., et al. (2018). Nodal surface semimetals: theory and material realization. *Phys. Rev. B* **97**, 115125.
53. Gao, H., Kim, Y., Venderbos, J.W.F., et al. (2018). Dirac-Weyl semimetal: coexistence of Dirac and Weyl fermions in polar hexagonal ABC crystals. *Phys. Rev. Lett.* **121**, 106404.
54. Wieder, B.J., Wang, Z., Cano, J., et al. (2020). Strong and fragile topological Dirac semimetals with higher-order fermi arcs. *Nat. Commun.* **11**, 627.
55. Xu, Y., and Duan, L.M. (2016). Type-II Weyl points in three-dimensional cold-atom optical lattices. *Phys. Rev. A* **94**, 053619.
56. Chang, G., Xu, S.-Y., Wieder, B.J., et al. (2017). Unconventional chiral fermions and large topological fermi arcs in RhSi. *Phys. Rev. Lett.* **119**, 206401.
57. Tang, P., Zhou, Q., and Zhang, S.-C. (2017). Multiple types of topological fermions in transition metal silicides. *Phys. Rev. Lett.* **119**, 206402.
58. Zhang, T., Song, Z., Alexandradinata, A., et al. (2018). Double-Weyl phonons in transition-metal monosilicides. *Phys. Rev. Lett.* **120**, 016401.
59. Miao, H., Zhang, T.T., Wang, L., et al. (2018). Observation of double Weyl phonons in parity-breaking FeSi. *Phys. Rev. Lett.* **121**, 035302.
60. Kresse, G., and Joubert, D. (1999). From ultrasoft pseudopotentials to the projector augmented-wave method. *Phys. Rev. B* **59**, 1758.
61. Kresse, G., and Furthmüller, J. (1996). Efficient iterative schemes for ab initio total-energy calculations using a plane-wave basis set. *Phys. Rev. B* **54**, 11169.
62. Hohenberg, P., and Kohn, W. (1964). Inhomogeneous electron gas. *Phys. Rev.* **136**, B864.
63. Kohn, W., and Sham, L.J. (1965). Self-consistent equations including exchange and correlation effects. *Phys. Rev.* **140**, A1133.
64. Perdew, J.P., Burke, K., and Ernzerhof, M. (1997). Generalized gradient approximation made simple [phys. Rev. Lett. 77, 3865 (1996)]. *Phys. Rev. Lett.* **78**, 1396-1396.
65. Perdew, J.P., Burke, K., and Ernzerhof, M. (1996). Generalized gradient approximation made simple. *Phys. Rev. Lett.* **77**, 3865.
66. Monkhorst, H.J., and Pack, J.D. (1976). Special points for brillouin-zone integrations. *Phys. Rev. B* **13**, 5188.
67. Liechtenstein, A.I., Anisimov, V.I., and Zaanen, J. (1995). Density-functional theory and strong interactions: Orbital ordering in mott-hubbard insulators. *Phys. Rev. B* **52**, R5467.
68. Dudarev, S.L., Botton, G.A., Savrasov, S.Y., et al. (1998). Electron-energy-loss spectra and the structural stability of nickel oxide: An LSDA + U study. *Phys. Rev. B* **57**, 1505.
69. Parkin, S.S.P., Marseglia, E.A., and Brown, P.J. (1983). Magnetic structure of Co<sub>1/3</sub>NbS<sub>2</sub> and Co<sub>1/3</sub>TaS<sub>2</sub>. *J. Phys. C: Solid State Phys.* **16**, 2765.
70. Mostofi, A.A., Yates, J.R., Lee, Y.-S., et al. (2008). Wannier90: A tool for obtaining maximally-localised wannier functions. *Comput. Phys. Commun.* **178**, 685–699.
71. Marzari, N., Mostofi, A.A., Yates, J.R., et al. (2012). Maximally localized wannier functions: Theory and applications. *Rev. Mod. Phys.* **84**, 1419.
72. Wu, Q., Zhang, S., Song, H.-F., et al. (2018). Wanniertools: An open-source software package for novel topological materials. *Comput. Phys. Commun.* **224**, 405–416.

#### ACKNOWLEDGMENTS

We thank Profs. Xiangang Wan, Huaxing Zhu, and Sixue Qin for helpful discussions. This work was supported by National Key R&D Program of China under Grant No. 2020YFA0308900, the National Natural Science Foundation of China under Grant No. 11874195, Guangdong Innovative and Entrepreneurial Research Team Program under Grant No. 2017ZT07C062, Guangdong Provincial Key Laboratory of Computational Science and Material Design under Grant No. 2019B030301001, the Science, Technology and Innovation Commission of Shenzhen Municipality (No. ZDSYS20190902092905285), and Center for Computational Science and Engineering of Southern University of Science and Technology.

#### AUTHOR CONTRIBUTIONS

Q.L. supervised the research with J.H. P.L. and A.Z. performed the calculations. All the authors contributed inputs to write the paper.

#### DECLARATION OF INTERESTS

The authors declare no competing interests.

#### SUPPLEMENTAL INFORMATION

Supplemental information can be found online at <https://doi.org/10.1016/j.xinn.2022.100343>.

#### LEAD CONTACT WEBSITE

Qihang Liu: <https://liuqh.phy.sustech.edu.cn/>.

**The Innovation, Volume 3**

**Supplemental Information**

**Chiral Dirac-like fermion in spin-orbit-free antiferromagnetic semimetals**

**Pengfei Liu, Ao Zhang, Jingzhi Han, and Qihang Liu**



## Supplementary Materials

### Chiral Dirac-like fermion in spin-orbit-free antiferromagnetic semimetals

Pengfei Liu<sup>1,2</sup>, Ao Zhang<sup>1</sup>, Jingzhi Han<sup>2</sup>, and Qihang Liu<sup>1,3,4,\*</sup>

<sup>1</sup>*Shenzhen Institute for Quantum Science and Engineering and Department of Physics, Southern University of Science and Technology, Shenzhen 518055, China*

<sup>2</sup>*School of Physics, Peking University, Beijing 100871, People's Republic of China*

<sup>3</sup>*Guangdong Provincial Key Laboratory of Computational Science and Material Design, Southern University of Science and Technology, Shenzhen 518055, China*

<sup>4</sup>*Shenzhen Key Laboratory of Advanced Quantum Functional Materials and Devices, Southern University of Science and Technology, Shenzhen 518055, China*

\*Email: [liuqh@sustech.edu.cn](mailto:liuqh@sustech.edu.cn)

#### Note S1. Dirac-like field with chirality – Flavor Weyl field

The Dirac fields obey the famous Dirac equation,  $(-i\alpha^i\partial_i + m\beta)\psi(x) = i\partial_0\psi(x)$ , where  $\alpha^i = \tau_x \otimes \sigma_i$  and  $\beta = \tau_z \otimes \sigma_0$ . Its field operators furnish a 4D irreducible representation of the Lorentz group. Such a group can be written as a combination of two disconnected pieces— $O(3,1) = SO(3,1) + P SO(3,1)$ , where  $SO(3,1)$ <sup>1</sup> is a connected subgroup of  $O(3,1)$ . The reducible representation of  $SO(3,1)$ , i.e.,  $(0,1/2) \oplus (1/2,0)$ , in the presence of  $P$ , becomes irreducible for the Lorentz group  $O(3,1)$ , giving rise to the Dirac fields. However, seldom considered is the possibility of elementary spin-1/2 particles described by four-component fields having  $(1/2,0) \oplus (1/2,0)$  (or equivalently,  $(0,1/2) \oplus (0,1/2)$ ). To achieve such fields,  $P$  should be broken, reducing the corresponding

symmetry group to  $SO(3,1)$ . Therefore,  $(1/2,0) \oplus (1/2,0)$  would become a reducible representation, corresponding to a field that naturally decomposes into two Weyl fields. Second, additional internal symmetries need to be assumed to elevate the symmetry hierarchy of the system, rendering  $(1/2,0) \oplus (1/2,0)$  representation irreducible. Internal symmetry operations are required to decouple the space-time operations according to the Coleman–Mandula theorem<sup>2</sup>. Furthermore, we selected them to form an  $SU(2)$  group connecting two Weyl fields with the same chirality, analogous to the  $SU(2)$  flavor symmetry in high-energy physics. Specifically, it is analogous to the isospin symmetry proposed by Heisenberg, pairing a proton and a neutron forming an  $SU(2)$  doublet.<sup>3</sup>

Such isospin symmetry can stabilize free and causal quantum fields that follow the representation  $(1/2,0) \oplus (1/2,0)$  (and  $(0,1/2) \oplus (0,1/2)$ ). The corresponding fields are called flavor Weyl fields, described by the following massless Dirac-like equation:

$$i\alpha^i \partial_i \psi(x) = \pm i\partial_0 \psi(x), \quad (1)$$

where  $\psi(x)$  denotes a four-component free field operator and  $\alpha^i = \tau_i \otimes \sigma_0$ . Furthermore, the energy spectrum of equation (1) is doubly degenerate owing to the protection of the additional  $SU(2)$  group, resembling the role of  $P$  in the Dirac equation.

To construct such flavor Weyl field, we firstly assume that inversion symmetry is broken such that left-handed Weyl field and right-handed Weyl field could exist individually. Then, we further assume a four component Dirac field can be written as the form  $\psi = \begin{pmatrix} \psi_L^1 \\ \psi_L^2 \end{pmatrix}$  where  $\psi_L^1$  and  $\psi_L^2$  are two left-handed and 2-component Weyl fields following the irreducible representation  $(1/2,0)$  of the proper orthochronous Lorentz transformation. Then the representation matrices of the angular momentum operators and boost operators

of proper orthochronous Lorentz transformation are  $\mathcal{J} = \frac{1}{2}\tau_0 \otimes \sigma$ ,  $\mathcal{K} = -\frac{i}{2}\tau_0 \otimes \sigma$ , where  $\tau_i$  and  $\sigma_j$  ( $i = 0, x, y, z$ ) are Pauli matrices.

Such field is reducible under proper orthochronous Lorentz transformation, to stabilize this field, we further assumes that there is an internal  $SU(2)$  symmetry group with generators represented as  $\mathcal{J} = \frac{1}{2}\boldsymbol{\tau} \otimes \sigma_0$ , which implies that the elements of  $SU(2)$  group transform on  $\psi = \begin{pmatrix} \psi_L^1 \\ \psi_L^2 \end{pmatrix}$  by  $exp(-i\boldsymbol{\theta} \cdot \frac{1}{2}\boldsymbol{\tau}) \begin{pmatrix} \psi_L^1 \\ \psi_L^2 \end{pmatrix}$ , identical to the transformation properties of  $SU(2)$  isospin symmetry on two quantum fields in standard model. Then, it is obvious that such field describe one particle formed by two Weyl fields connected by the internal  $SU(2)$  symmetry group.

Then, following the process of constructing field operator provided in Ref. <sup>4</sup>, we can see that  $\psi$  can be constructed for describing massless spin-1/2 particles. It could also be shown that this field obeys the following equation

$$(-\partial_0 + \alpha^i \partial_i)\psi(x) = 0, \quad (4)$$

where  $\alpha^i = \sigma_0 \otimes \sigma_i$ . This 4-component field have 4 independent variables, however, when we do not assume internal  $SU(2)$  symmetry group, the field operator will reduce to operators with two independent variables.

## **Note S2. Spin space groups and description of magnetic materials without spin-orbit coupling**

Because spin and orbit degrees of freedom are partially decoupled in magnetic systems when SOC effect is weak, we follow the notations by Litvin et al. that write spin and spatial

operations in separate slots and denote spin rotations and spatial rotations as  $U_{\mathbf{n}}(\theta)$  and  $C_{\mathbf{m}}(\varphi)$ , respectively<sup>5,6</sup>, where  $\mathbf{n}$  and  $\mathbf{m}$  denote are rotation axes and  $\theta$  and  $\varphi$  the rotation angles. By considering time reversal  $T$ , spatial inversion symmetry  $P$  and translation symmetry  $\mathbf{t}$ , all elements of a spin space group can be written as the following form:

$$\{T^{n_1} U_{\mathbf{n}}(\theta) || P^{n_2} C_{\mathbf{m}}(\varphi) | \mathbf{t}\},$$

with  $n_1 = 0,1$  and  $n_2 = 0,1$ . Although time-reversal  $T$  could reverse momentum in the reciprocal space, both  $T$  and  $U_{\mathbf{n}}(\theta)$  can be seen as the symmetries of spin in real space when analyzing the symmetry.  $P$ ,  $C_{\mathbf{m}}(\varphi)$  and  $\mathbf{t}$  are spatial symmetries. Thus, we separate the 5 types of symmetry into spin symmetries,  $T$  and  $U_{\mathbf{n}}(\theta)$ , and spatial symmetries,  $P$ ,  $C_{\mathbf{m}}(\varphi)$  and  $\mathbf{t}$ , by a double vertical line.

When spin-orbit coupling is neglected in magnetic materials, spin and lattice DOF are decoupled, rendering three kinds of operation, i.e., pure spin operation, pure spatial operation and operation of combined spin and spatial operation. This allows the definition of two types of spin group, i.e., nontrivial and a trivial spin group, where the nontrivial spin group is composed of spatial operations or/and combined operations of spatial and spin operations, and the trivial spin group is formed by pure spin operations. It has been shown that every spin group can be written as the direct product of a nontrivial and a trivial spin group<sup>5</sup>.

The recent discussions about spin group symmetry mainly focus on nontrivial spin groups, especially nontrivial spin point groups. In ref. <sup>7</sup>, symmetry invariants of all nontrivial spin point groups, used for classifying projective representations based on the second group cohomology, are listed. In ref. <sup>8</sup>, energy band degeneracy and topological

insulating phases protected by the combined operations of spin rotation and spatial rotation are discussed. Nevertheless, even if the complex spiral incommensurate magnetic structures are excluded from consideration, spin point groups with trivial part containing more than identity element cannot be neglected in general. This is because the collinear or coplanar magnetic structures, commonly existing in realistic materials, have trivial part containing symmetry elements that could usually contribute to spin degeneracy and quasiparticle excitations. Most importantly, the spin point groups of magnetic structures corresponding to type-IV magnetic groups have additional trivial part being significant which contribute to flavor Weyl points discussed in the main text.

For non-spiral magnetic structures classified into conventional type-I and type-III magnetic space group, the spin point group part of spin space group has trivial part being  $\{E\}$  for noncoplanar magnetic structures,  $Z_2^K$  for coplanar but not collinear magnetic structures, and  $Z_2^K \times SO(2)$  for collinear magnetic structures, where  $SO(2)$  is the spin rotation group with rotation operations along the axis of magnetic order  $x$ , and  $Z_2^K = \{\{E||E|0\}, \{U_{\mathbf{n}}(\pi)T||E|0\}\}$  is the group generated by the combined operation of a spin rotation operation perpendicular to the magnetic moments and a time reversal operation. All of the 597 nontrivial spin point groups, which directly applies to noncoplanar spin arrangements, are listed in ref. <sup>6</sup>. For spin arrangements being coplanar and collinear, there are 252 and 90 possible spin point groups, derived in ref. <sup>8</sup>. However, for spiral magnetic structures described by any type of magnetic space group or non-spiral magnetic structures described by type-IV magnetic space group, the spin point group part of spin space group could go beyond  $\{E\}$ ,  $Z_2^K$  and  $Z_2^K \times SO(2)$  because of the existence of operations of the form  $\{R||E|\boldsymbol{\tau}\}$  where  $\boldsymbol{\tau}$  is a lattice translation with  $\{E||E|\boldsymbol{\tau}\}$  is not contained in the spin

space group. Specifically, if a nonchiral magnetic structure belongs to type-IV magnetic space group, the existence of time reversal symmetry combined with translation symmetry  $\{T||E|\boldsymbol{\tau}\}$  would add a group  $Z_2^T = \{E||E\}, \{T||E\}$  to the trivial spin point group and the spin group would be  $Z_2^T \times Z_2^K \times SO(2)$  or  $Z_2^T \times Z_2^K$ . Most importantly, the combination of  $Z_2^T$  and  $Z_2^K$  will lead to spin flip symmetry  $\{U_n(\pi)||E\}$  which corresponds to the combined symmetry of 180 degree of spin rotation and half translation in spin space group,  $\{U_n(\pi)||E|\boldsymbol{\tau}_{1/2}\}$ . This symmetry  $\{U_n(\pi)||E|\boldsymbol{\tau}_{1/2}\}$  is contained in the little group of every momentum in the Brillouin zone, which could lead to effective  $SU(2)$  isospin symmetry if there is additionally a  $SO(2)$  group, as is shown in the main text.

### **Note S3. Symmetry properties of $\text{CoNb}_3\text{S}_6$ when neglecting spin-orbit coupling**

We know that without consideration of magnetic order in  $\text{CoNb}_3\text{S}_6$ , the crystal structure belongs to the space group  $P6_322$ , following Hermann–Mauguin notation, while, with magnetic order, the structure corresponds to type-IV magnetic space group  $P_B2_12_12$ . If using notations of spin group (Ref. <sup>6</sup>), the magnetic space group is  $P_B^{2x}2_1^{2y}2_1^{2z}2$ , with all spatial rotation combined with a spin rotation of the same angle around the same axis. This group commute with the single electron Hamiltonian of this system with spin orbit coupling (SOC), and there cannot be more symmetry operations beyond this group (Ref. <sup>5,8,9</sup>).

If we neglect SOC now, the spin rotations and spatial rotations are not forced to be operated simultaneously, i.e., be operated at the same time with the same angle and the same rotation axis. Thus, in addition to the magnetic group  $P_B^{2x}2_1^{2y}2_1^{2z}2$ , decoupled spin and orbit rotation operations appear to commute with the Hamiltonian of our system<sup>8</sup>.

Because the distribution of magnetic moments does not guarantee 6-fold rotations or 3-fold rotations of the form  $\{U_{\mathbf{n}}(\pi) || C_z(\pi/3) | \boldsymbol{\tau}\}$  or  $\{U_{\mathbf{n}}(\pi) || C_z(2\pi/3) | \boldsymbol{\tau}\}$ , the rotations of the highest order of the system are still two fold rotations. Thus, the nontrivial spin space group of this system can be written as the magnetic space group,  $P_B^2 2_1^2 2_1^2 2$ . From Ref. <sup>8</sup>, the trivial spin space group of this collinear magnetic system is unique to be  $SO(2) \times Z_2^K$ . Then, the full spin space group of this system can be written as product of these two groups  $(P_B^2 2_1^2 2_1^2 2)(SO(2) \times Z_2^K)$ . By selecting the proper nontrivial part of this group, we can write the group as direct product of a trivial group and a nontrivial group,  $(P_B^1 2_1^1 2_1^1 2) \times (SO(2) \times Z_2^K) = P_B^1 2_1^1 2_1^1 2^{\infty m} 1$ , where  $^{\infty m} 1$  represents the trivial part of spin space group  $SO(2) \times Z_2^K$ . The elements of this full spin group are shown in Table S1.

Note that there could be more than one choice of the nontrivial part of a spin space group, such that the full spin space group can be written as the direct product of the nontrivial one with a trivial group. In the case of spin space group  $P_B^1 2_1^1 2_1^1 2^{\infty m} 1$ , by replacing every time reversal operation contained in the elements of the group  $P_B^1 2_1^1 2_1^1 2$  to a spin rotation  $U_{\mathbf{y}}(\pi)$  (or any other spin rotations  $U_{\mathbf{n}}(\pi)$ , with  $\mathbf{n} \parallel \cos\varphi \hat{y} + \sin\varphi \hat{z}$ ,  $\varphi \in (0, \pi]$ ), the resulting group still commutes with  $^{\infty m} 1$ , thus we can write the full spin space group as the direct product of this group with  $^{\infty m} 1$ .

Table S1. Group elements of the magnetic space group and spin group describing  $\text{CoNb}_3\text{S}_6$ .

|           | Spin space group      | Group elements                                                                                                                                                                                             |
|-----------|-----------------------|------------------------------------------------------------------------------------------------------------------------------------------------------------------------------------------------------------|
| w/<br>SOC | $P_B^2 2_1^2 2_1^2 2$ | H: $\{E    E   0\}, \{U_x(\pi)    C_x(\pi)   0\},$<br>$\{U_y(\pi)    C_y(\pi)   \boldsymbol{\tau}_{(\mathbf{b}+\mathbf{c})/2}\}, \{U_z(\pi)    C_z(\pi)   \boldsymbol{\tau}_{(\mathbf{b}+\mathbf{c})/2}\}$ |

|            |                                                |                                                                                                                                                                                                                                                                                                                            |
|------------|------------------------------------------------|----------------------------------------------------------------------------------------------------------------------------------------------------------------------------------------------------------------------------------------------------------------------------------------------------------------------------|
|            |                                                | M: $\{T  E \boldsymbol{\tau}_{(a+b)/2}\}, \{TU_x(\pi)  C_x(\pi) \boldsymbol{\tau}_{(a+b)/2}\},$<br>$\{TU_y(\pi)  C_y(\pi) \boldsymbol{\tau}_{(a+c)/2}\}, \{TU_z(\pi)  C_z(\pi) \boldsymbol{\tau}_{(a+c)/2}\}$                                                                                                              |
| w/o<br>SOC | Nontrivial:<br>$P_B^+ 2_1^- 1_2^+ 2_1^- 1_2^+$ | H: $\{E  E 0\}, \{E  C_x(\pi) 0\},$<br>$\{E  C_y(\pi) \boldsymbol{\tau}_{(a+c)/2}\}, \{E  C_z(\pi) \boldsymbol{\tau}_{(a+c)/2}\}$<br>M: $\{T  E \boldsymbol{\tau}_{(a+b)/2}\}, \{T  C_x(\pi) \boldsymbol{\tau}_{(a+b)/2}\},$<br>$\{T  C_y(\pi) \boldsymbol{\tau}_{(b+c)/2}\}, \{T  C_z(\pi) \boldsymbol{\tau}_{(b+c)/2}\}$ |
|            | Trivial:<br>$\infty m_1$                       | $\{TU_n(\pi)  E 0\}$ ( $n \parallel \cos\varphi\hat{y} + \sin\varphi\hat{z}$ , $\varphi \in (0, \pi]$ )<br>$\{U_x(\theta)  E 0\}$ ( $\theta \in (0, 2\pi]$ )                                                                                                                                                               |

$$\boldsymbol{\tau}_{(a+b)/2} = (1/2, 1/2, 0), \boldsymbol{\tau}_{(b+c)/2} = (0, 1/2, 1/2), \boldsymbol{\tau}_{(a+c)/2} = (1/2, 0, 1/2);$$

H/M: elements with/without time-reversal symmetry.

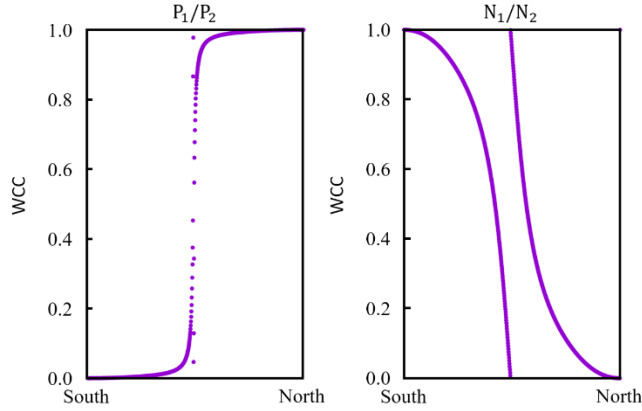

Fig. S1. Evolution of Wannier charge centers (WCCs) calculated on a spherical surface enclosing  $P_1/P_2$  and  $N_1/N_2$ . The calculation results show that the Dirac points  $P_1$  and  $P_2$  have chirality  $+2$  and the Dirac points  $N_1$  and  $N_2$  have chirality  $-2$ .

#### Note S4. The other material candidates

In Table S2 we provide the list of flavor Weyl materials according to the symmetry filters. Such procedure has screened out 62 material candidates. Then, we further carry out DFT calculations on these candidates without considering spin-orbit coupling. In this step,



we rule out the materials that are insulating, and focus on the flavor Weyl point near the Fermi level (within  $\sim 1$  eV around the Fermi level).

Table S2. Collinear antiferromagnetic materials realizing flavor Weyl semimetal. The label and chemical formula in the table are from the Bilbao MAGNDATA database.

|                                                         |                                                                      |                                                                      |                                                        |
|---------------------------------------------------------|----------------------------------------------------------------------|----------------------------------------------------------------------|--------------------------------------------------------|
| 1.32:Lu <sub>2</sub> MnCoO <sub>6</sub>                 | 1.565:Pb <sub>2</sub> CoOsO <sub>6</sub>                             | 1.429:BaFe <sub>2</sub> Se <sub>3</sub>                              | 1.184:Na <sub>2</sub> Co <sub>2</sub> TeO <sub>6</sub> |
| 1.330:Lu <sub>2</sub> CoMnO <sub>6</sub>                | 1.592:Pb <sub>2</sub> NiOsO <sub>6</sub>                             | 1.111:GdBiPt                                                         | 1.192:SmMn <sub>2</sub> O <sub>5</sub>                 |
| 1.438:BaCoF <sub>4</sub>                                | 1.325:PrMn <sub>2</sub> O <sub>5</sub>                               | 1.232:CuMnSb                                                         | 1.335:Nd <sub>2</sub> Pd <sub>2</sub> In               |
| 1.64:BaNiF <sub>4</sub>                                 | 1.374:HoNiGe                                                         | 1.58:La <sub>2</sub> O <sub>2</sub> Fe <sub>2</sub> OSe <sub>2</sub> | 1.586:PrFeAsO                                          |
| 1.100:Cu <sub>2</sub> MnSnS <sub>4</sub>                | 1.583:La <sub>1.5</sub> Ca <sub>0.5</sub> CoO <sub>4</sub>           | 1.120:BaFe <sub>2</sub> Se <sub>3</sub>                              | 1.18:MnS <sub>2</sub>                                  |
| 1.440:CrPS <sub>4</sub>                                 | 1.55:Na <sub>2</sub> MnF <sub>5</sub>                                | 1.79:Li <sub>2</sub> CoSiO <sub>4</sub>                              | 1.439:BaCoF <sub>4</sub>                               |
| 1.459:CeFe <sub>3</sub> (BO <sub>3</sub> ) <sub>4</sub> | 1.136:AgCrS <sub>2</sub>                                             | 1.589:Fe <sub>0.967</sub> Nb <sub>3</sub> S <sub>6</sub>             | 1.472:CaOFeS                                           |
| 1.7:NdFe <sub>3</sub> B <sub>4</sub> O <sub>12</sub>    | 1.561:GeNi <sub>2</sub> O <sub>4</sub>                               | 1.349:CoNb <sub>3</sub> S <sub>6</sub>                               | 1.71:SrCo <sub>2</sub> V <sub>2</sub> O <sub>8</sub>   |
| 1.90:YFe <sub>3</sub> (BO <sub>3</sub> ) <sub>4</sub>   | 1.563:GeNi <sub>2</sub> O <sub>4</sub>                               | 1.50:AgNiO <sub>2</sub>                                              | 1.101:LuMnO <sub>3</sub>                               |
| 1.20:HoMnO <sub>3</sub>                                 | 1.341:TmMnO <sub>3</sub>                                             | 1.86:GeV <sub>4</sub> S <sub>8</sub>                                 | 1.298:BaCdVO(PO <sub>4</sub> ) <sub>2</sub>            |
| 1.263:Ca <sub>3</sub> Ru <sub>2</sub> O <sub>7</sub>    | 1.33:ErAuGe                                                          | 1.504:GdCuSn                                                         | 1.505:GdAgSn                                           |
| 1.506:GdAuSn                                            | 1.353:SmNiO <sub>3</sub>                                             | 1.354:EuNiO <sub>3</sub>                                             | 1.43:PrNiO <sub>3</sub>                                |
| 1.45:NdNiO <sub>3</sub>                                 | 1.463:Sr <sub>2</sub> Fe <sub>3</sub> Se <sub>2</sub> O <sub>3</sub> | 1.172:NiTa <sub>2</sub> O <sub>6</sub>                               | 1.281:YBaCuFeO <sub>5</sub>                            |
| 1.24:ZnV <sub>2</sub> O <sub>4</sub>                    | 1.574:NdBiPt                                                         | 1.156:LaMn <sub>3</sub> Cr <sub>4</sub> O <sub>12</sub>              | 1.165:Ni <sub>3</sub> TeO <sub>6</sub>                 |
| 1.581:FeTiO <sub>3</sub>                                | 1.91:TbFe <sub>3</sub> (BO <sub>3</sub> ) <sub>4</sub>               | 1.233:CuMnSb                                                         | 1.265:CuMnSb                                           |
| 1.424:UCu <sub>5</sub>                                  | 1.275:Ba <sub>6</sub> Co <sub>6</sub> ClO <sub>15.5</sub>            |                                                                      |                                                        |

Except for CoNb<sub>3</sub>S<sub>6</sub>, we show another representative candidate, i.e., GdCuSn, for ideal flavor Weyl points near the Fermi level. GdCuSn adopts an orthorhombic crystal structure and a collinear AFM order with the magnetic moments originated from Gd 4f electrons (Supplementary Fig. S2a). Different from CoNb<sub>3</sub>S<sub>6</sub>, GdCuSn is nonchiral, yet supporting flavor Weyl points. We thus plot its band structure in the AFM phase (Fig. S2b) and identify two inequivalent flavor Weyl points occurring at the generic momenta, as shown in Figs. S2c-S2f. Each of the two Weyl points represents four equivalent flavor Weyl points connected by nonsymmorphic glide reflection symmetries with the glide mirrors perpendicular to the x and y axis.

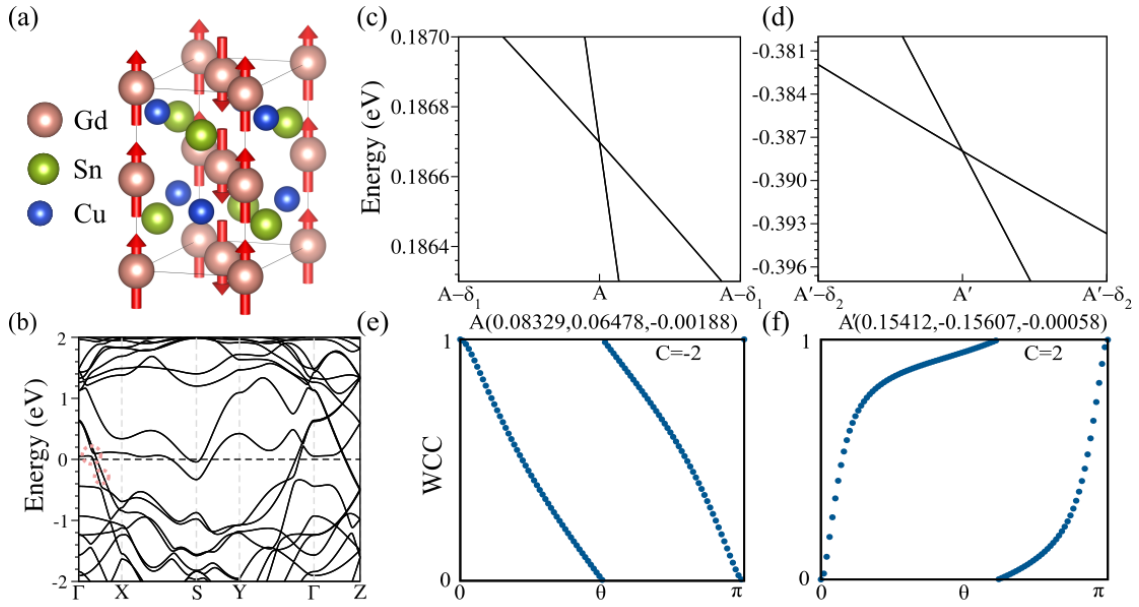

Figure S2: (a) The crystal and collinear AFM magnetic structure of GdCuSn. The red arrow denotes the direction of the magnetic moment. (b) The band structure of GdCuSn without spin-orbit coupling. The black dashed line and pink dashed circles denote the Fermi level and the rough positions of the flavor Weyl points, respectively. (c,e) the electronic structure near the flavor Weyl point. There are four flavor Weyl points at  $\sim 0.19$  eV above the Fermi level which are labeled by A, and another four flavor Weyl points at  $\sim 0.39$  eV below the Fermi level A'. Note that . (e,f) The Wannier charge centers (WCCs) of the flavor Weyl points and their Chern numbers.

## Supplementary References

1. For simplicity, we only consider the orthochronous part of the Lorentz group because time-reversal symmetry is not relevant for the discussion of the conventional and chiral Dirac fields.
2. Coleman, S., and Mandula, J. (1967). All possible symmetries of the s matrix. *Phys. Rev.* **159**, 1251.
3. Heisenberg, W. (1932). Über den bau der atomkerne. I. *Z. Phys.* **77**, 1-11.
4. Weinberg, S. (2004). *The quantum theory of fields: Foundations* (World Books Publishing Corporation).
5. Litvin, D.B., and Opechowski, W. (1974). Spin groups. *Physica* **76**, 538-554.
6. Litvin, D.B. (1977). Spin point groups. *Acta Crystallogr. A* **33**, 279-287.
7. Yang, J., Liu, Z.-X., and Fang, C. (2021). Symmetry invariants of spin space groups in magnetic materials. [arXiv:2105.12738](https://arxiv.org/abs/2105.12738).
8. Liu, P., Li, J., Han, J., et al. (2021). Spin-group symmetry in magnetic materials with negligible spin-orbit coupling. [arXiv:2103.15723](https://arxiv.org/abs/2103.15723).
9. Brinkman, W.F., and Elliott, R.J. (1966). Theory of spin-space groups. *Proc. R. Soc. A* **294**, 343-358.
